# Supplementary material for: The use of wireless sensors in the neonatal intensive care unit: a study protocol
Source: PeerJ. 2023 Jun 27;11:e15578. doi: 10.7717/peerj.15578 (PMC10312156; doi:10.7717/peerj.15578)
Supplement: Supplemental Information 4 — List of abbreviations used to annotate different types of clinical events and care which may occur during study monitoring periods and impact data quality and values. [file peerj-11-15578-s004.docx]

|  | **CODE** | **Reason** |
| --- | --- | --- |
| **Sensors /BioDash Related** | AF | Biodash Application Failure/Malfunction |
| CP-ECG | Change of ECG probes |
| CP-RR | Change respiratory probe |
| CP-SpO2 | Change of SpO2 probe |
| CP-T | Change of temperature probe |
| PS | Poor Sensor Signal |
| SR-adj | Sensor readjustment |
| SR-rep | Sensor replacement |
| -SX | Sensor Removal |
| **Routine Care + Behaviors** | B | Bathing |
| BT | Blood Test (via heel stick or other local acute extraction method) |
| C | Crying |
| DC | Diaper change |
| KC | Kangaroo Care |
| PP | Prone positioning |
| RC | Routine care (other) **specify |
| SL | Sleeping |
| SP | Supine position |
| **Feeding** | BF | Breastfeeding |
| FB | Feeding by bottle |
| G | Gavage |
| **Respiratory & Cardiac** | AC | Airway Care |
| CPAP | Continuous positive air pressure (specify type) |
| CRE | Cardiorespiratory Event (requiring nurse intervention) |
| EX | Extubation |
| I | Intubation |
| MV | Mechanical Ventilation |
| NC | Nasal canula |
| NIPPV | Nasal Intermittent Positive Pressure Ventilation |
| **Clinical Events** | CS | Clinical Seizure |
| F | Fever (temperature above 37.8 C) |
| H | Hypothermia (temperature below 36 C) |
| SaEEG | Seizure - aEEG |
| SEEG | Seizure - EEG |
| **Treatments & Procedures** | AL | Arterial Line |
| BTR | Blood Transfusion |
| IV | Intravenous line |
| MA | Medication Administration (specify medication) |
| NT | Nasogastric tube |
| PS | Painful stimulus (i.e. painful procedure) |
| PT | Phototherapy |
| T | Transport/transfer |
| TH | Therapeutic Hypothermia |
| U | Ultrasound |
| XR | X-Ray |
| **Other** | O | Other event, specify |
